# Supplementary material for: Four-step thermosensitive dielectric response arising from motionable low-symmetry ammonium confined in deformable supramolecular cages
Source: Royal Society of Chemistry journal article supplement (doi:10.1039/d1tc01568k), 2021-01-01
Supplement: d1tc01568k1.pdf [file d1tc01568k1.pdf]

**Supporting Information for**

**Four-Step Thermosensitive Dielectric Response Arising from Motionable Low-Symmetry Ammonium Confined in Deformable Supramolecular Cages**

Zhi-Hui Jia,<sup>a</sup> Jing-Yan Liu,<sup>b</sup> De-Xuan Liu,<sup>c</sup> Shi-Yong Zhang,<sup>b</sup> Zi-Yi Du,<sup>\*a</sup> Chun-Ting He,<sup>\*a</sup> Wei-Xiong Zhang,<sup>\*c</sup> and Xiao-Ming Chen<sup>c</sup>

<sup>a</sup>*College of Chemistry and Chemical Engineering, MOE Key Laboratory of Functional Small Organic Molecule, Jiangxi Normal University, Nanchang 330022, China.*

<sup>b</sup>*College of Chemistry and Chemical Engineering, Gannan Normal University, Ganzhou 341000, China.*

<sup>c</sup>*School of Chemistry, MOE Key Laboratory of Bioinorganic and Synthetic Chemistry, Sun Yat-Sen University, Guangzhou 510275, China.*

*\*Correspondence to: Zi-Yi Du, E-mail: [ziyidu@gmail.com](mailto:ziyidu@gmail.com). Chun-Ting He, E-mail: [hct@jxnu.edu.cn](mailto:hct@jxnu.edu.cn).*

*Wei-Xiong Zhang, E-mail: [zhangwx6@mail.sysu.edu.cn](mailto:zhangwx6@mail.sysu.edu.cn).*

## Index

**Table S1** Summary of crystal data and structural refinement for **1** at the three phases

**Table S2** Selected bond lengths (Å) for **1** at the three phases

**Table S3** The S...S contacts (Å) in **1** at the three phases

**Table S4** The fitting parameters of the doubly superimposed Havriliak–Negami equation for **1** at specific temperatures

**Chart S1** Evolution of the supramolecular cage types with variable free volumes in the four phases of **1**

**Fig. S1** Room-temperature powder XRD patterns of **1**

**Fig. S2** Final Rietveld refinement result for **1λ** phase at 393 K

**Fig. S3** Thermogravimetric curve of **1**

**Fig. S4** In situ above-room-temperature DSC measurement for **1** recorded on variable heating/cooling rates of 1, 3, 5 and 10 K/min, respectively.

**Fig. S5** ORTEP representations of the selected unit of **1** at 120 K (a), 180 K (b), and 296 K (c), respectively. For comparison, the overlay map of the  $[\text{Ni}(\text{NCS})_6]^{4-}$  anions in three phases is shown in (d)

**Fig. S6** View of the overall stacking of **1λ** phase

**Fig. S7** Comparison of the room-temperature supramolecular  $\{[\text{Ni}(\text{NCS})_6]^{4-}\}_\infty$  layers in  $(\text{Me}_3\text{NH})_4[\text{Ni}(\text{NCS})_6]$  (a) and **1γ** (b). From **γ** to **λ** phase, the  $\{[\text{Ni}(\text{NCS})_6]^{4-}\}_\infty$  layer is broken and the  $[\text{Ni}(\text{NCS})_6]^{4-}$  anions turn disordered dynamically. The significantly changed geometric arrangement of the  $[\text{Ni}(\text{NCS})_6]^{4-}$  anions is shown in (c)

**Fig. S8** Views of the overall stacking of **1γ** (a), **1β** (b) and **1α** phases (c), respectively

**Fig. S9** Views of the stacking of the supramolecular layers of  $[\text{Ni}(\text{NCS})_6]^{4-}$  anions in **1β** phase down the a-axis. The N5-, N6- and N7-containing  $\text{Me}_2\text{EtNH}^+$  ions reside in the supramolecular cages **C**, **D** and **E**, respectively

**Fig. S10** Views of the stacking of the supramolecular layers of  $[\text{Ni}(\text{NCS})_6]^{4-}$  anions in **1α** phase down the a-axis. The N7-, N8-, N9- and N10-containing  $\text{Me}_2\text{EtNH}^+$  ions reside in the supramolecular cages **F**, **G**, **H** and **I**, respectively

**Fig. S11** Local snapshots of NVT dynamic simulations at 120 K for N7-containing  $\text{Me}_2\text{EtNH}^+$  ion in **1α** phase over the simulation time (a-g), and the overlapping maps of these snapshots (h)

**Fig. S12** Local snapshots of NVT dynamic simulations at 120 K for N8-containing  $\text{Me}_2\text{EtNH}^+$  ion in **1α** phase over the simulation time (a-g), and the overlapping maps of these snapshots (h)

**Fig. S13** Local snapshots of NVT dynamic simulation at 120 K for N9-containing  $\text{Me}_2\text{EtNH}^+$  ion in **1α** phase over the simulation time (a-g), and the overlapping maps of these snapshots (h)

**Fig. S14** Local snapshots of NVT dynamic simulation at 120 K for N10-containing  $\text{Me}_2\text{EtNH}^+$  ion in **1α** phase over the simulation time (a-g), and the overlapping maps of these snapshots (h)

**Fig. S15** Local snapshots of NVT dynamic simulation at 180 K for N5-containing  $\text{Me}_2\text{EtNH}^+$  ion in **1 $\beta$**  phase over the simulation time (a-g), and the overlapping maps of these snapshots (h)

**Fig. S16** Local snapshots of NVT dynamic simulation at 180 K for N6-containing  $\text{Me}_2\text{EtNH}^+$  ion in **1 $\beta$**  phase over the simulation time (a-g), and the overlapping maps of these snapshots (h)

**Fig. S17** Local snapshots of NVT dynamic simulation at 180 K for N7-containing  $\text{Me}_2\text{EtNH}^+$  ion in **1 $\beta$**  phase over the simulation time (a-g), and the overlapping maps of these snapshots (h)

**Fig. S18** Local snapshots of NVT dynamic simulation at 300 K for N3-containing  $\text{Me}_2\text{EtNH}^+$  ion in **1 $\gamma$**  phase over the simulation time (a-g), and the overlapping maps of these snapshots (h)

**Fig. S19** Local snapshots of NVT dynamic simulation at 300 K for N4-containing  $\text{Me}_2\text{EtNH}^+$  ion in **1 $\gamma$**  phase over the simulation time (a-g), and the overlapping maps of these snapshots (h)

**Fig. S20** Overlapping maps of the snapshots for one  $[\text{Ni}(\text{NCS})_6]^{4-}$  anion (a) and two N3-containing  $\text{Me}_2\text{EtNH}^+$  ions (b, c), respectively, by first-principles NVT dynamic simulation of **1 $\lambda$**  phase at simulation temperature of 573 K, showing orientation changes and short-range displacements over the simulation time of 0, 2, 4, 6, 8, and 10 ps

**Fig. S21** The variable-temperature Cole–Cole plots as a series of arcs shown the relationship between  $\epsilon'$  and  $\epsilon''$ . Based on the obtained fitting parameters, the fitted Cole–Cole diagrams of two separated relaxation processes 1 and 2 are illustrated in the inset map

**Fig. S22** Variable-temperature impedance spectra for the polycrystalline pellet of **1**

**Fig. S23** Variable-temperature infrared spectra of **1**

**Table S1** Summary of crystal data and structural refinement for **1** at three phases

|                                                                                            |                             |                |                |
|--------------------------------------------------------------------------------------------|-----------------------------|----------------|----------------|
| Temperature (K)                                                                            | 120(2)                      | 180(2)         | 296(2)         |
| Empirical formula                                                                          | $C_{22}H_{48}N_{10}S_6Ni_1$ |                |                |
| Formula weight                                                                             | 703.77                      |                |                |
| Phase                                                                                      | $\alpha$                    | $\beta$        | $\gamma$       |
| Space group <sup>[a]</sup>                                                                 | $P2_1/n$                    | $Pbnm$         | $Acam$         |
| <i>a</i> (Å)                                                                               | 12.783(3)                   | 12.8756(3)     | 12.9430(7)     |
| <i>b</i> (Å)                                                                               | 14.478(3)                   | 14.5845(3)     | 15.0014(8)     |
| <i>c</i> (Å)                                                                               | 19.285(4)                   | 19.1455(4)     | 19.3631(11)    |
| $\theta$ /deg                                                                              | 90.207(6)                   | 90             | 90             |
| <i>V</i> /Å <sup>3</sup>                                                                   | 3569.0(14)                  | 3595.22(13)    | 3759.6(4)      |
| <i>Z</i>                                                                                   | 4                           | 4              | 4              |
| <i>D</i> <sub>calcd</sub> /g cm <sup>-3</sup>                                              | 1.310                       | 1.300          | 1.243          |
| $\mu$ /mm <sup>-1</sup>                                                                    | 0.924                       | 0.917          | 0.877          |
| GOF on <i>F</i> <sup>2</sup>                                                               | 1.069                       | 1.044          | 1.050          |
| <i>R</i> <sub>1</sub> , <i>wR</i> <sub>2</sub> [ <i>I</i> > 2σ( <i>I</i> )] <sup>[b]</sup> | 0.0508, 0.1026              | 0.0484, 0.1280 | 0.0569, 0.1624 |
| <i>R</i> <sub>1</sub> , <i>wR</i> <sub>2</sub> (all data)                                  | 0.0699, 0.1150              | 0.0540, 0.1309 | 0.0816, 0.1836 |

<sup>[a]</sup>To straightly compare the corresponding cell parameters, non-standard space groups for them were adopted here.

<sup>[b]</sup> $R_1 = \sum ||F_o| - |F_c|| / \sum |F_o|$ ,  $wR_2 = \{\sum w[(F_o)^2 - (F_c)^2]^2 / \sum w[(F_o)^2]^2\}^{1/2}$

**Table S2** Selected bond lengths (Å) for **1** at three phases

| $\alpha$ phase at 120 K |          |            |          |
|-------------------------|----------|------------|----------|
| Ni(1)–N(6)              | 2.064(4) | Ni(1)–N(5) | 2.070(4) |
| Ni(1)–N(3)              | 2.081(4) | Ni(1)–N(4) | 2.086(4) |
| Ni(1)–N(6)              | 2.094(3) | Ni(1)–N(6) | 2.115(3) |
| $\beta$ phase at 180 K  |          |            |          |
| Ni(1)–N(2)              | 2.064(2) | Ni(1)–N(1) | 2.083(2) |
| Ni(1)–N(3)              | 2.093(2) | Ni(1)–N(4) | 2.106(2) |
| $\gamma$ phase at 296 K |          |            |          |
| Ni(1)–N(2)              | 2.078(3) | Ni(1)–N(1) | 2.113(4) |

**Table S3** The S...S contacts (Å) in **1** at three phases

| $\alpha$ phase at 120 K |          |               |          |
|-------------------------|----------|---------------|----------|
| S(3)···S(6)#1           | 3.462(2) | S(4)···S(5)#2 | 3.536(2) |
| S(1)···S(2)#3           | 3.594(2) |               |          |
| $\beta$ phase at 180 K  |          |               |          |
| S(2)···S(3)#4           | 3.553(1) | S(1)···S(4)#3 | 3.611(1) |
| $\gamma$ phase at 296 K |          |               |          |
| S(2)···S(2)#5           | 3.573(2) | S(1)···S(1)#6 | 3.632(2) |

Symmetry code: #1.  $1/2 + x, 3/2 - y, -1/2 + z$ ; #2.  $1/2 + x, 3/2 - y, 1/2 + z$ ; #3.  $1 + x, y, z$ ; #4.  $x, 1 + y, z$ ; #5.  $3/2 - x, y, 1/2 - z$ ; #6.  $2 - x, 1 - y, 1 - z$ .

**Table S4** The fitting parameters of the doubly superimposed Havriliak–Negami equation for **1** at specific temperatures

| $T$ (K) | $\epsilon_{\infty}$ | $\alpha_1$ | $\beta_1$ | $\Delta\epsilon_1$ | $\tau_{0,1}$ (s)     | $\alpha_2$ | $\beta_2$ | $\Delta\epsilon_2$ | $\tau_{0,2}$ (s)     | $\sigma_{dc}$         |
|---------|---------------------|------------|-----------|--------------------|----------------------|------------|-----------|--------------------|----------------------|-----------------------|
| 263     | 4.78                | 0          | 0.79      | 3.00               | $7.0 \times 10^{-7}$ | -          |           | -                  | -                    | -                     |
| 273     | 4.71                | 0          | 0.73      | 3.04               | $4.2 \times 10^{-7}$ | 0          | 0.67      | 0.53               | $1.2 \times 10^{-2}$ | $4.4 \times 10^{-11}$ |
| 283     | 4.64                | 0          | 0.68      | 3.10               | $2.4 \times 10^{-7}$ | 0          | 0.66      | 0.76               | $8.6 \times 10^{-3}$ | $5.5 \times 10^{-10}$ |
| 293     | 4.54                | 0          | 0.63      | 3.21               | $1.6 \times 10^{-7}$ | 0          | 0.65      | 1.08               | $6.4 \times 10^{-3}$ | $1.5 \times 10^{-9}$  |
| 303     | 4.42                | 0          | 0.57      | 3.34               | $1.0 \times 10^{-7}$ | 0          | 0.65      | 1.63               | $4.5 \times 10^{-3}$ | $3.8 \times 10^{-9}$  |
| 313     | 4.30                | 0          | 0.49      | 3.49               | $7.0 \times 10^{-8}$ | 0          | 0.64      | 2.49               | $3.3 \times 10^{-3}$ | $9.5 \times 10^{-9}$  |

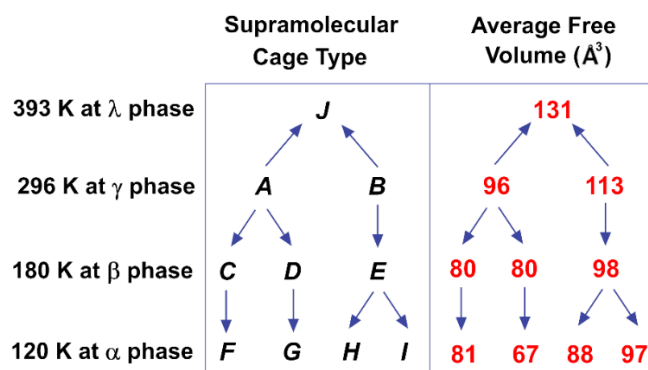

**Chart S1** Evolution of the supramolecular cage types with variable free volumes (using a probe radius set as 2.4  $\text{\AA}$ ) in the four phases of **1**.

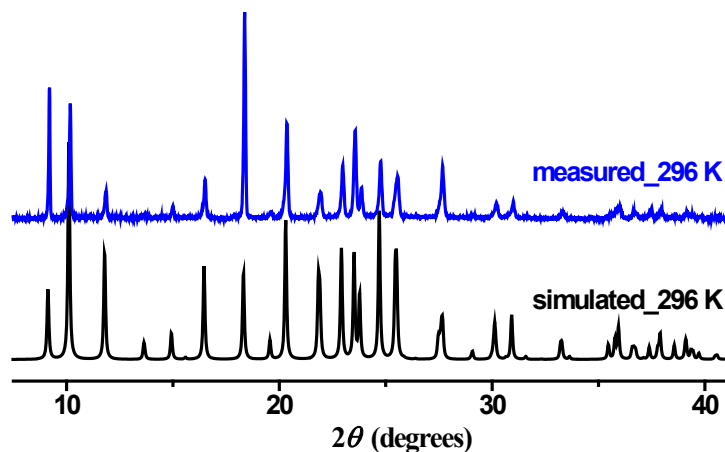

**Fig. S1** Room-temperature powder XRD patterns of **1**.

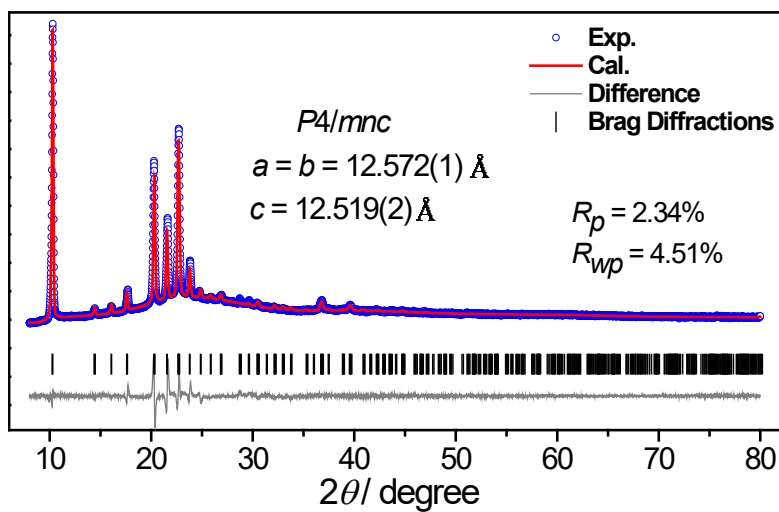

**Fig. S2** Final Rietveld refinement result for **1 $\lambda$**  phase at 393 K.

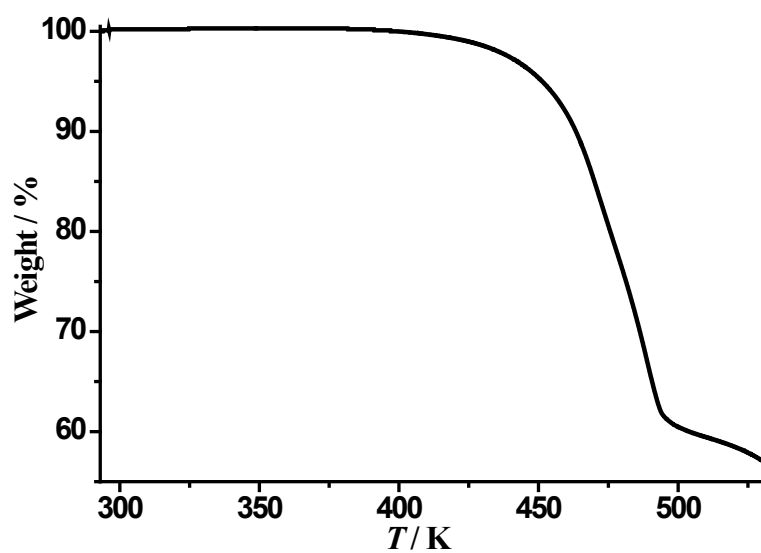

Fig. S3 Thermogravimetric curve of 1.

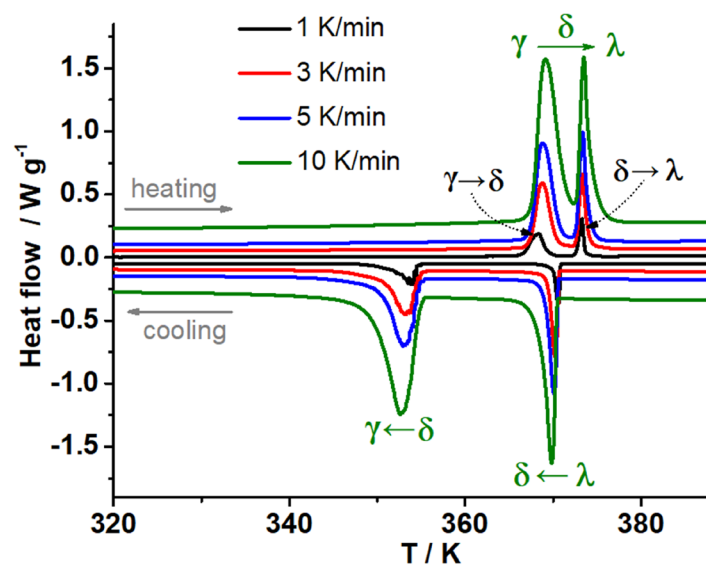

Fig. S4 In situ above-room-temperature DSC measurement for 1 recorded on variable heating/cooling rates of 1, 3, 5 and 10 K/min, respectively.

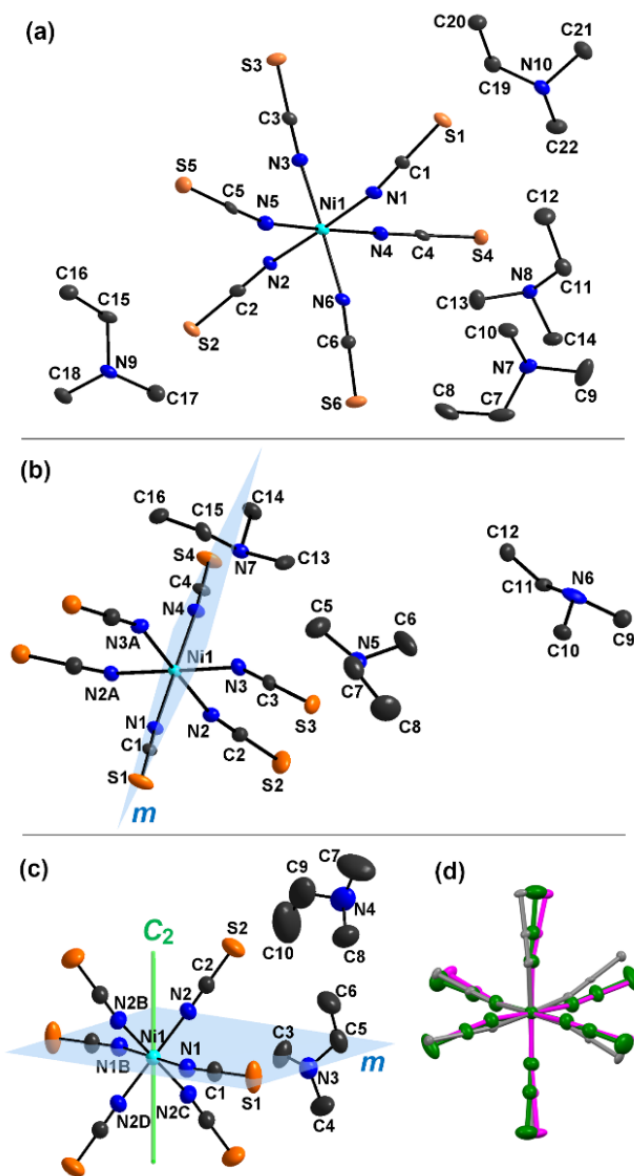

**Fig. S5** ORTEP representations of the selected unit of **1** at 120 K (a), 180 K (b), and 296 K (c), respectively, with symmetry breaking and increasing thermal vibration amplitude. For the disordered Me<sub>2</sub>EtNH<sup>+</sup> ions in (b) and (c), only one orientation is shown for clarity. For comparison, the overlay map of the [Ni(NCS)<sub>6</sub>]<sup>4-</sup> anions in three phases is shown in (d), shaded in grey (120 K), purple (180 K), and green (296 K), respectively. Symmetry codes: A)  $x, y, 1/2 - z$ ; B)  $1 - x, 1 - y, z$ ; C)  $x, y, 1 - z$ ; D)  $1 - x, 1 - y, 1 - z$ .

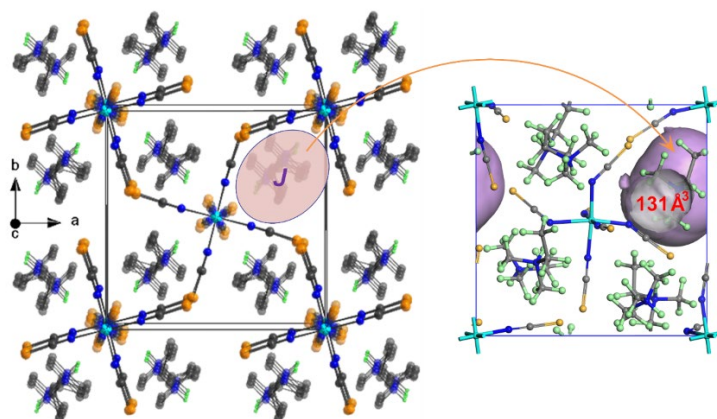

**Fig. S6** View of the overall stacking in **1λ** phase. The disordered  $\text{Me}_2\text{EtNH}^+/\text{[Ni(NCS)}_6\text{]}^{4-}$  ions are shaded in transparent. The N4-containing  $\text{Me}_2\text{EtNH}^+$  ions reside in the supramolecular cage **J**. For display details, see Fig. 2.

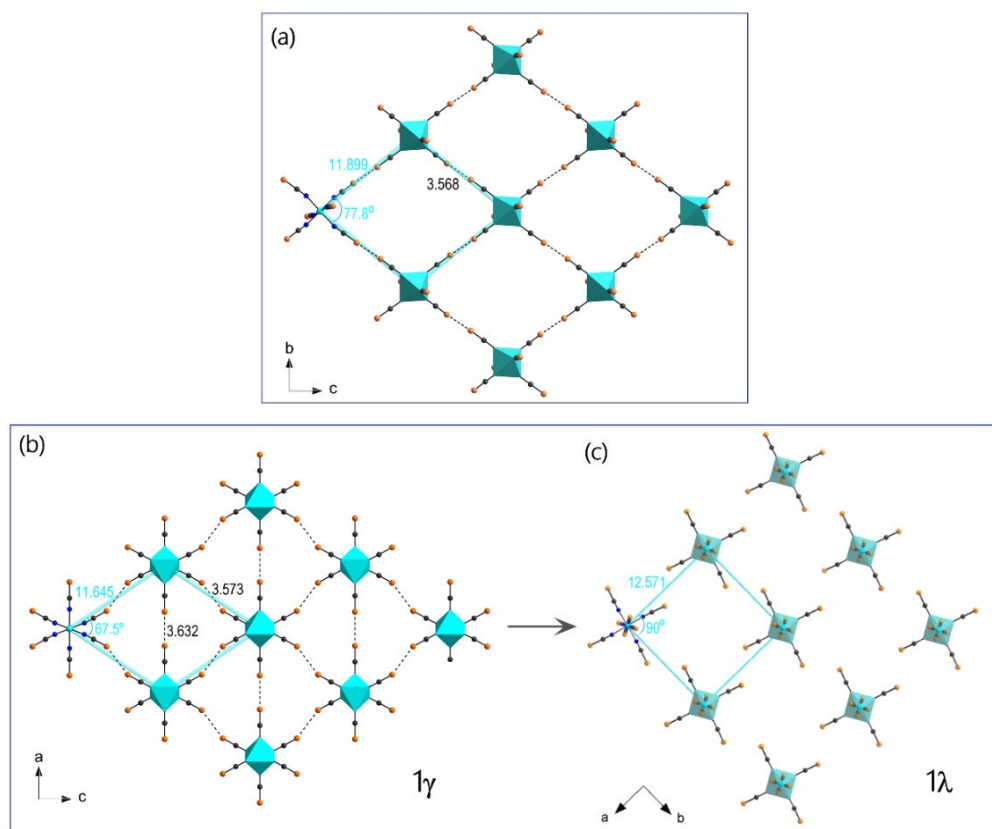

**Fig. S7** Comparison of the room-temperature supramolecular  $\{[\text{Ni(NCS)}_6]^{4-}\}_\infty$  layers in  $(\text{Me}_3\text{NH})_4[\text{Ni(NCS)}_6]$  (a) and **γ** (b). The S...S contacts are represented by dashes. From **1γ** to **1λ**, the supramolecular  $\{[\text{Ni(NCS)}_6]^{4-}\}_\infty$  layer is broken and the  $[\text{Ni(NCS)}_6]^{4-}$  anions turn disordered dynamically. The significantly changed geometric arrangement of the  $[\text{Ni(NCS)}_6]^{4-}$  anions is shown in (c).

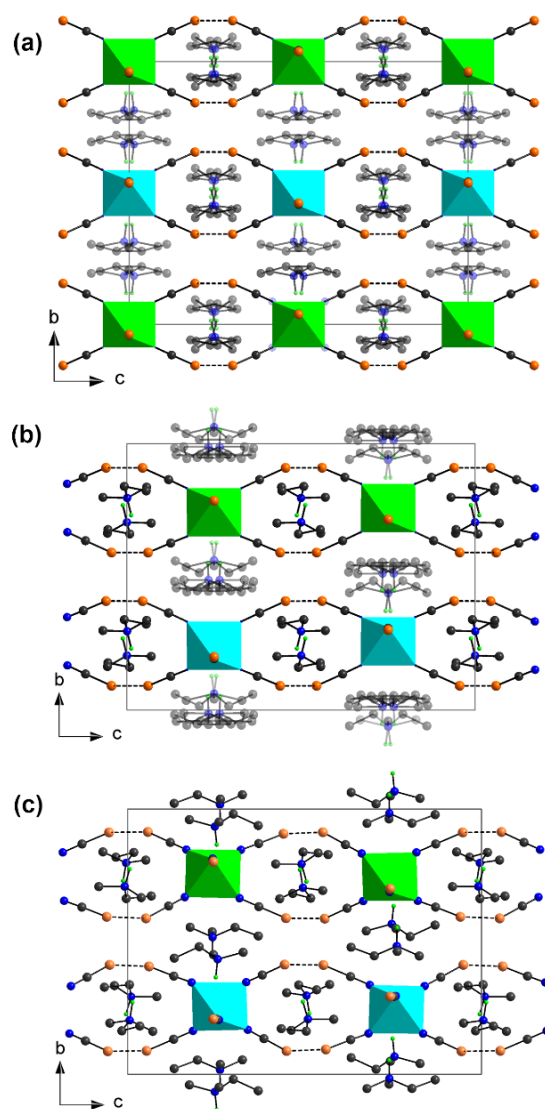

**Fig. S8** Views of the overall stacking of **1 $\gamma$**  (a), **1 $\beta$**  (b) and **1 $\alpha$**  phases (c), respectively. The disordered  $\text{Me}_2\text{EtNH}^+$  ions are shaded in transparent.

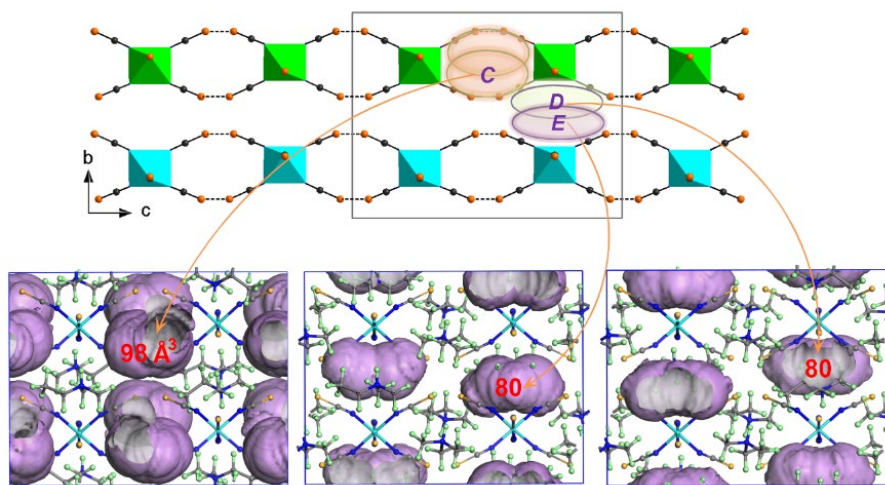

**Fig. S9** Views of the stacking of the supramolecular layers of  $[\text{Ni}(\text{NCS})_6]^{4-}$  anions in  $1\beta$  phase (180 K) down the  $a$ -axis. The N5-, N6- and N7-containing  $\text{Me}_2\text{EtNH}^+$  ions reside in the supramolecular cages **C**, **D** and **E**, respectively. For display details, see Fig. 2.

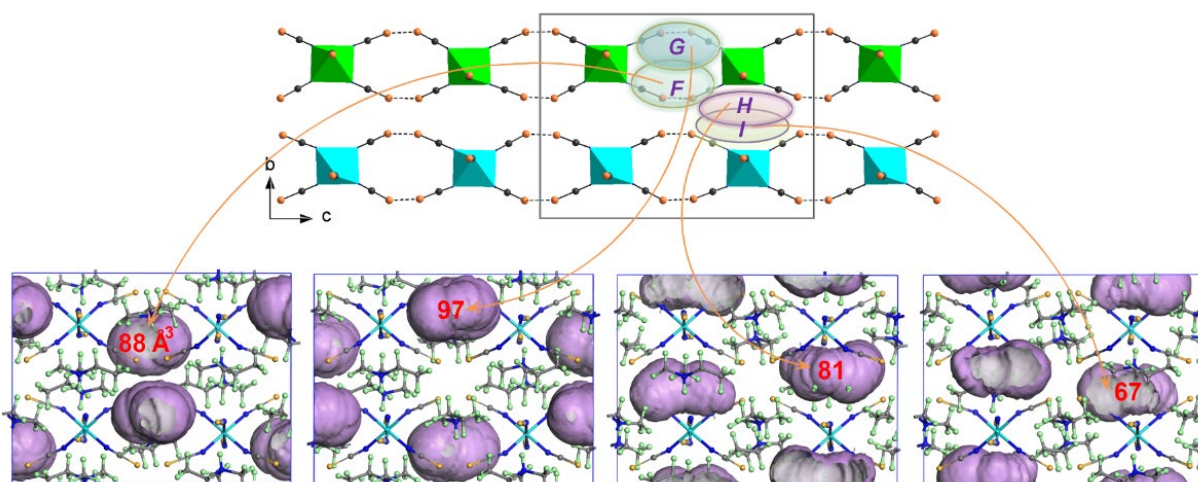

**Fig. S10** Views of the stacking of the supramolecular layers of  $[\text{Ni}(\text{NCS})_6]^{4-}$  anions in  $1\alpha$  phase (120 K) down the  $a$ -axis. The N7-, N8-, N9- and N10-containing  $\text{Me}_2\text{EtNH}^+$  ions reside in the supramolecular cages **F**, **G**, **H** and **I**, respectively. For display details, see Fig. 2.

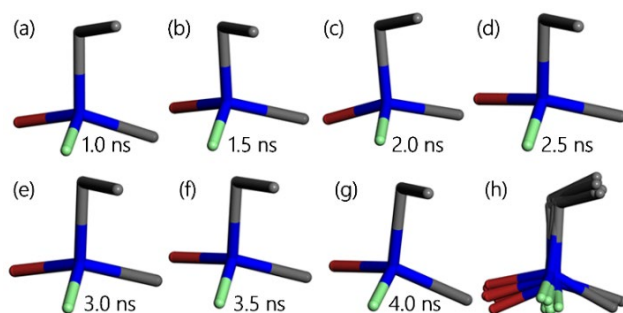

**Fig. S11** Local snapshots of NVT dynamic simulation at 120 K for N7-containing  $\text{Me}_2\text{EtNH}^+$  ion in  $1\alpha$  phase over the simulation time (a-g), and the overlapping maps of these snapshots (h). All C-bound H atoms are omitted for clarity.

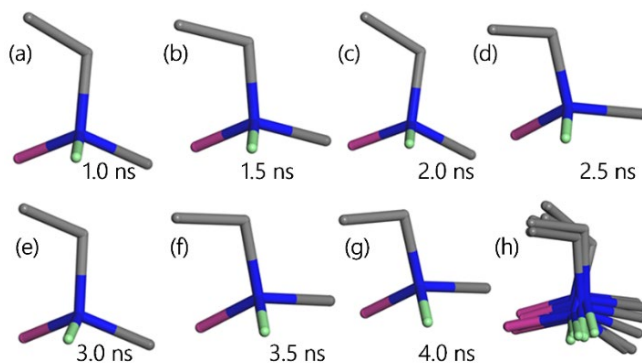

**Fig. S12** Local snapshots of NVT dynamic simulation at 120 K for N8-containing  $\text{Me}_2\text{EtNH}^+$  ion in  $1\alpha$  phase over the simulation time (a-g), and the overlapping maps of these snapshots (h).

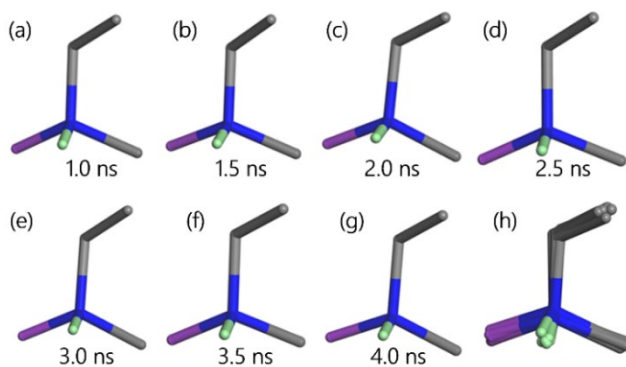

**Fig. S13** Local snapshots of NVT dynamic simulation at 120 K for N9-containing  $\text{Me}_2\text{EtNH}^+$  ion in  $1\alpha$  phase over the simulation time (a-g), and the overlapping maps of these snapshots (h).

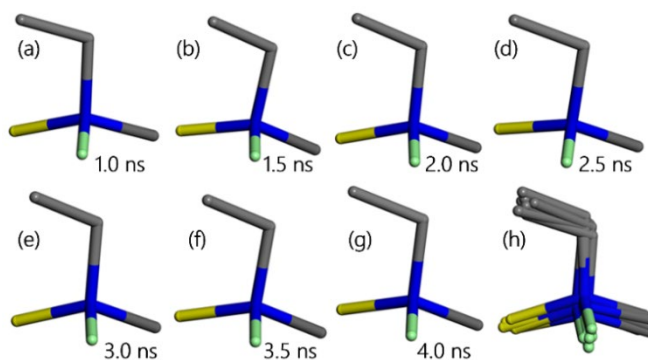

**Fig. S14** Local snapshots of NVT dynamic simulation at 120 K for N10-containing  $\text{Me}_2\text{EtNH}^+$  ion in  $1\alpha$  phase over the simulation time (a-g), and the overlapping maps of these snapshots (h).

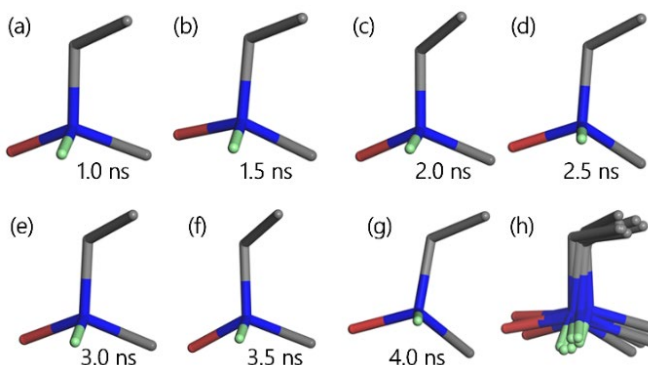

**Fig. S15** Local snapshots of NVT dynamic simulation at 180 K for N5-containing  $\text{Me}_2\text{EtNH}^+$  ion in  $1\beta$  phase over the simulation time (a-g), and the overlapping maps of these snapshots (h).

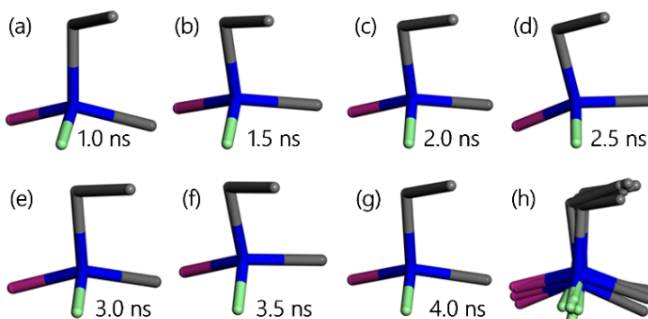

**Fig. S16** Local snapshots of NVT dynamic simulation at 180 K for N6-containing  $\text{Me}_2\text{EtNH}^+$  ion in  $1\beta$  phase over the simulation time (a-g), and the overlapping maps of these snapshots (h).

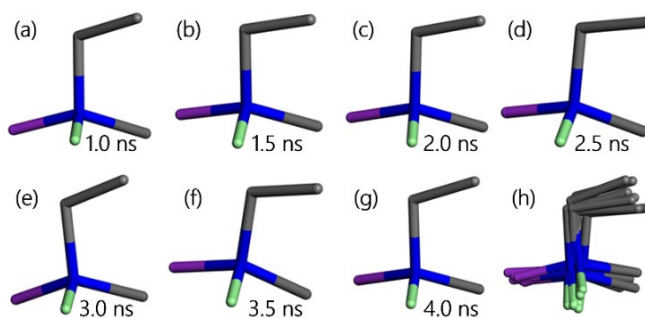

**Fig. S17** Local snapshots of NVT dynamic simulation at 180 K for N7-containing  $\text{Me}_2\text{EtNH}^+$  ion in  $1\beta$  phase over the simulation time (a-g), and the overlapping maps of these snapshots (h).

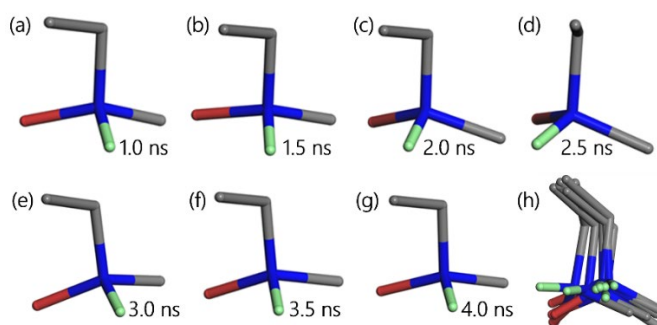

**Fig. S18** Local snapshots of NVT dynamic simulation at 300 K for N3-containing  $\text{Me}_2\text{EtNH}^+$  ion in  $1\gamma$  phase over the simulation time (a-g), and the overlapping maps of these snapshots (h).

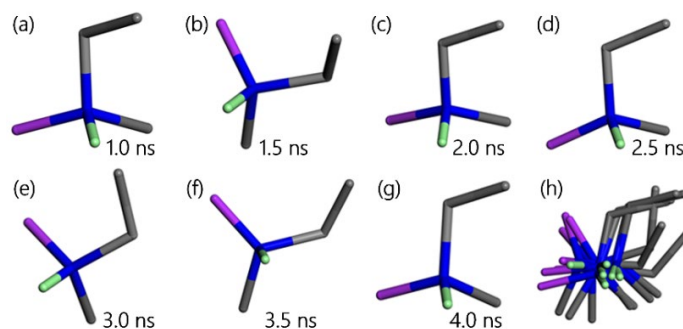

**Fig. S19** Local snapshots of NVT dynamic simulation at 300 K for N4-containing  $\text{Me}_2\text{EtNH}^+$  ion in  $1\gamma$  phase over the simulation time (a-g), and the overlapping maps of these snapshots (h).

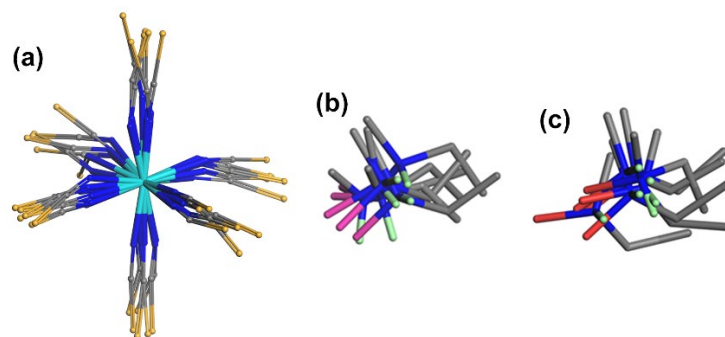

**Fig. S20** Overlapping maps of the snapshots for one  $[\text{Ni}(\text{NCS})_6]^{4-}$  anion (a) and two N3-containing  $\text{Me}_2\text{EtNH}^+$  ions (b, c), respectively, by first-principles NVT dynamic simulation of **1a** phase at simulation temperature of 573 K, showing orientation changes and short-range displacements over the simulation time of 0, 2, 4, 6, 8, and 10 ps.

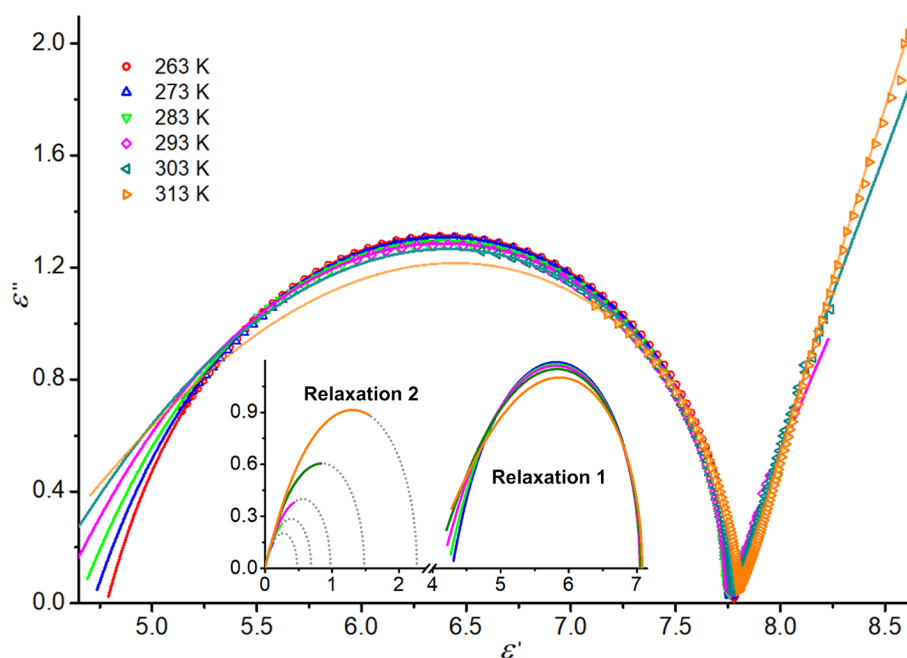

**Fig. S21** The variable-temperature Cole-Cole plots as a series of arcs shown the relationship between  $\epsilon'$  and  $\epsilon''$ . Based on the obtained fitting parameters, the fitted Cole-Cole diagrams of two separated relaxation processes 1 and 2 are illustrated in the inset map.

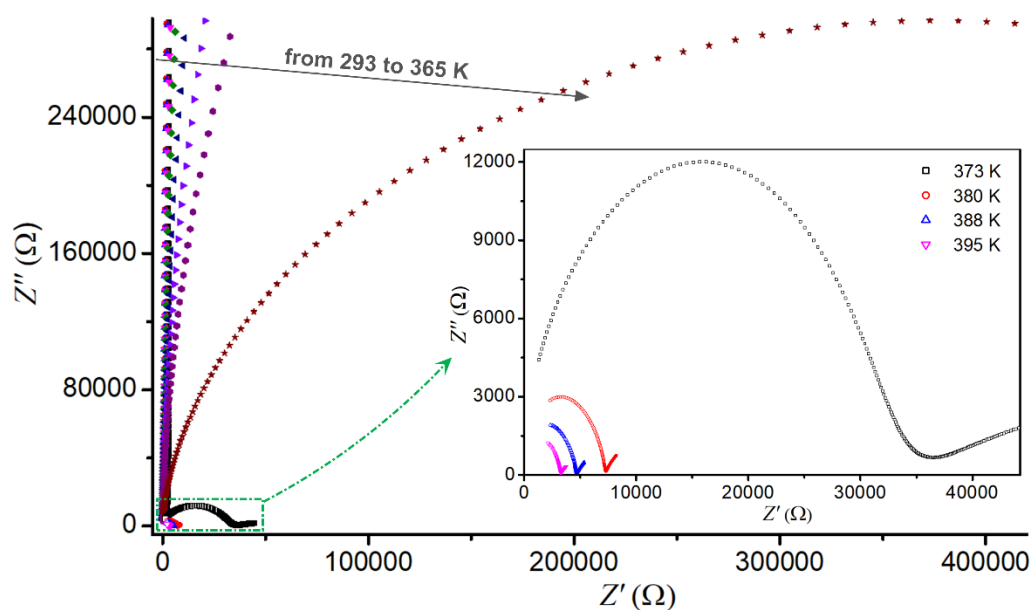

**Fig. S22** Variable-temperature impedance spectra for the polycrystalline pellet of **1** in the temperature range from 293 to 395 K.

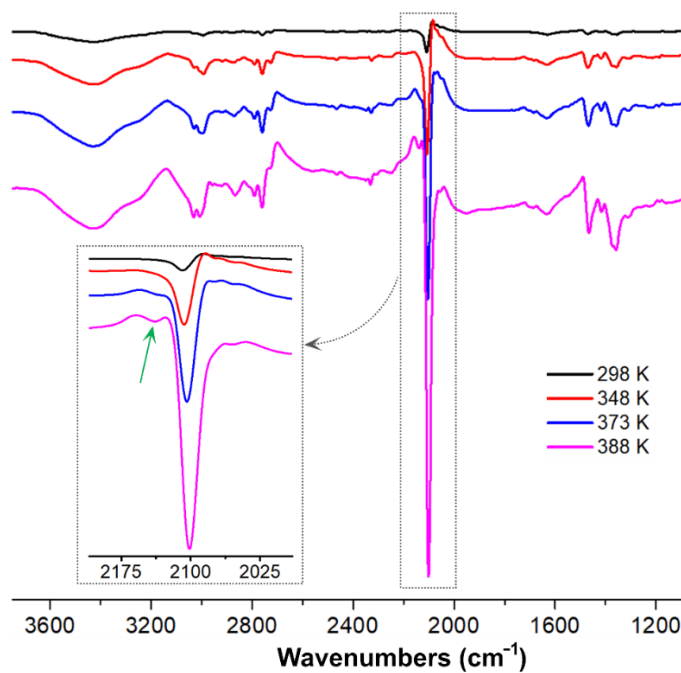

**Fig. S23** Variable-temperature infrared spectra of **1** in the temperature range from 298 to 388 K.
